# Supplementary material
Source: MDPI journal article supplement (https://www.mdpi.com/2073-4344/9/6/529)
Supplement: s1 [file s1]

# High Efficiency Visible Light Responsive Sulfide $\text{KSb}_5\text{S}_8$

## Photo-catalyst with Layered Crystal Structure

### *Supporting Information*

Yuan Yuan Li<sup>\*a,b</sup>, Mei Jun Wu<sup>a</sup>, Qiang Wang<sup>a,b</sup>, Kun Wang<sup>c</sup>, He Zhang<sup>c</sup>, Xue Jun Quan, Bin Zhang<sup>\*d</sup>,

Ding Feng Yang<sup>\*c</sup>

<sup>a</sup>Department of Biological and Chemical Engineering, Chongqing University of Education, Chongqing 400067,

People's Republic of China. E-mail: liyy@cque.edu.cn

<sup>b</sup>Cooperative Innovation Center of Lipid Resources and Children's Daily Chemicals, Chongqing University of Education, Chongqing 400067, People's Republic of China.

<sup>c</sup>College of Chemistry and Chemical Engineering, Chongqing University of Technology, 69 Hongguang Rd., Lijiatuo, Banan District, Chongqing 400054, People's Republic of China. E-mail: yangxunscience@cqut.edu.cn

<sup>d</sup>Analytical and Testing Center of Chongqing University, Chongqing 401331, People's Republic of China.

E-mail: welon5337@126.com

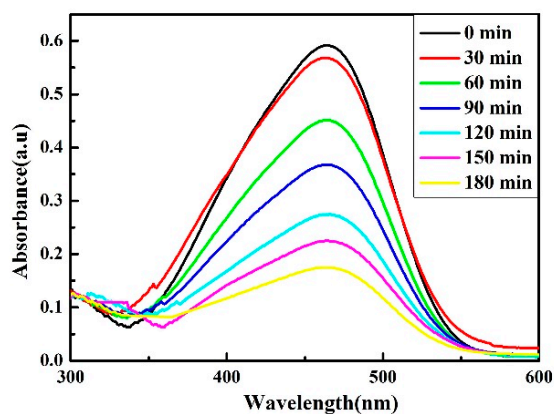

Figure S1. Uv-vis absorption of MO solution as function of irradiation time for  $\text{KSb}_5\text{S}_8$ .

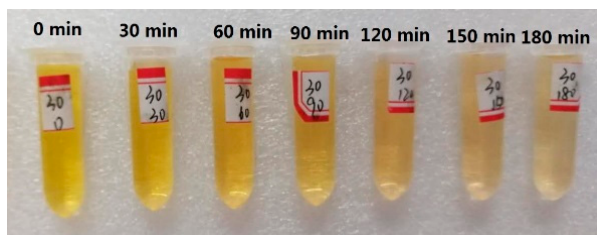

Figure S2. The photograph of MO solution for different irradiation time

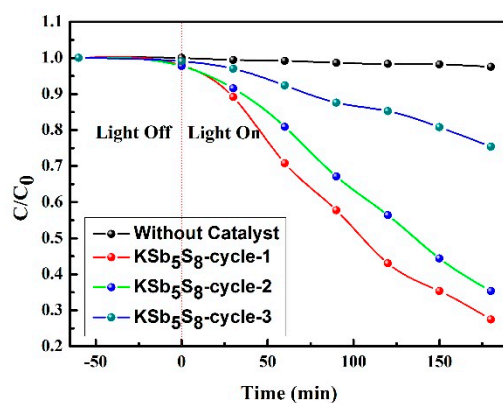

Figure S3. Cycling performance of  $\text{KSb}_5\text{S}_8$  for the degradation of MO solution under visible light.

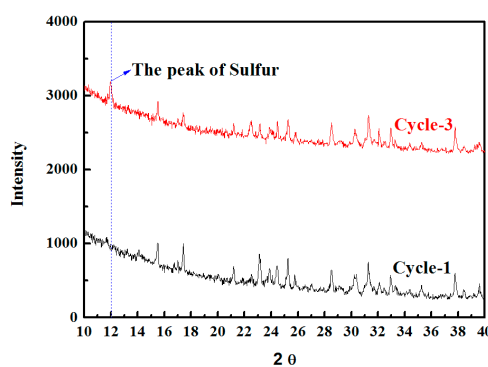

Figure S4. XRD patterns of  $\text{KSb}_5\text{S}_8$  after the cycling performance of photocatalytic degradation of MO solution.

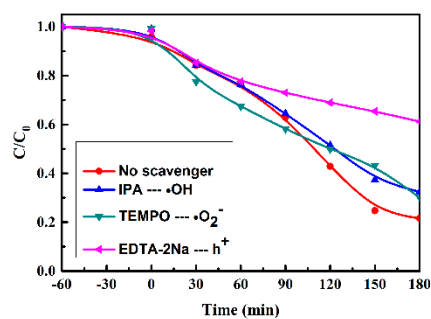

Figure S5. Photodegradation of MO solution with the additional scavenger under visible light.

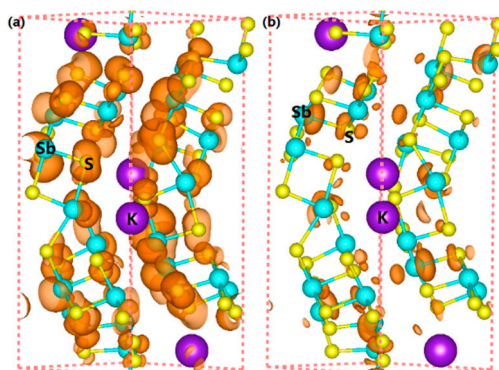

Figure S6. The iso-surface of charge density with given energy window of 0.2 eV from the top and bottom of the band edge (a) VBM (b) CBM (iso-surface value 0.002)

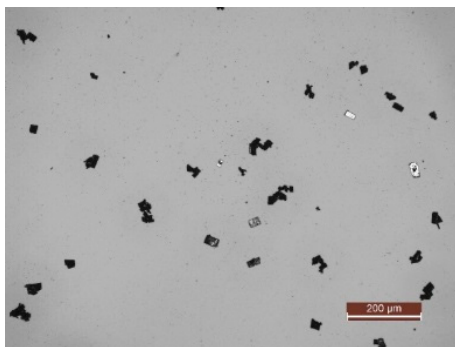

Figure S7. Optical microscopy image of  $\text{KSb}_5\text{S}_8$  from hydrothermal preparation.
